# Supplementary material for: Synthesis ofl-cysteine-based boron compounds and their evaluation as proteasome inhibitors
Source: Royal Society of Chemistry journal article supplement (doi:10.1039/c4nj00612g), 2014-07-14

**Electronic Supplementary Information (SI) for**  
**New Journal of Chemistry**

**Synthesis of L-cysteine-based boron compounds and their  
evaluation as proteasome inhibitors**

Priscila Milani<sup>a</sup>, Marilene Demasi<sup>b#</sup>, Leandro de Rezende<sup>c</sup>, Antonia T. do Amaral<sup>c</sup>  
and Leandro H. Andrade <sup>a\*</sup>

<sup>a</sup> *Laboratório de Química Fina e Biocatálise, Instituto de Química, Universidade de São Paulo, Av. Prof. Lineu Prestes 748, SP 05508-900, São Paulo, Brazil.*

<sup>b</sup> *Laboratório de Bioquímica e Biofísica, Instituto Butantan, Av. Vital Brasil, 1500, SP 05503-900 001 - São Paulo, Brazil.*

<sup>c</sup> *Laboratório de QSAR e Modelagem Molecular de Compostos Bioativos, Instituto de Química, Universidade de São Paulo, Av. Prof. Lineu Prestes 748, SP 05508-900, São Paulo, Brazil.*

\*Corresponding author: Leandro H. Andrade

email: [leandroh@iq.usp.br](mailto:leandroh@iq.usp.br)

#Co-corresponding author: Marilene Demasi

Email: [marimasi@butantan.gov.br](mailto:marimasi@butantan.gov.br)

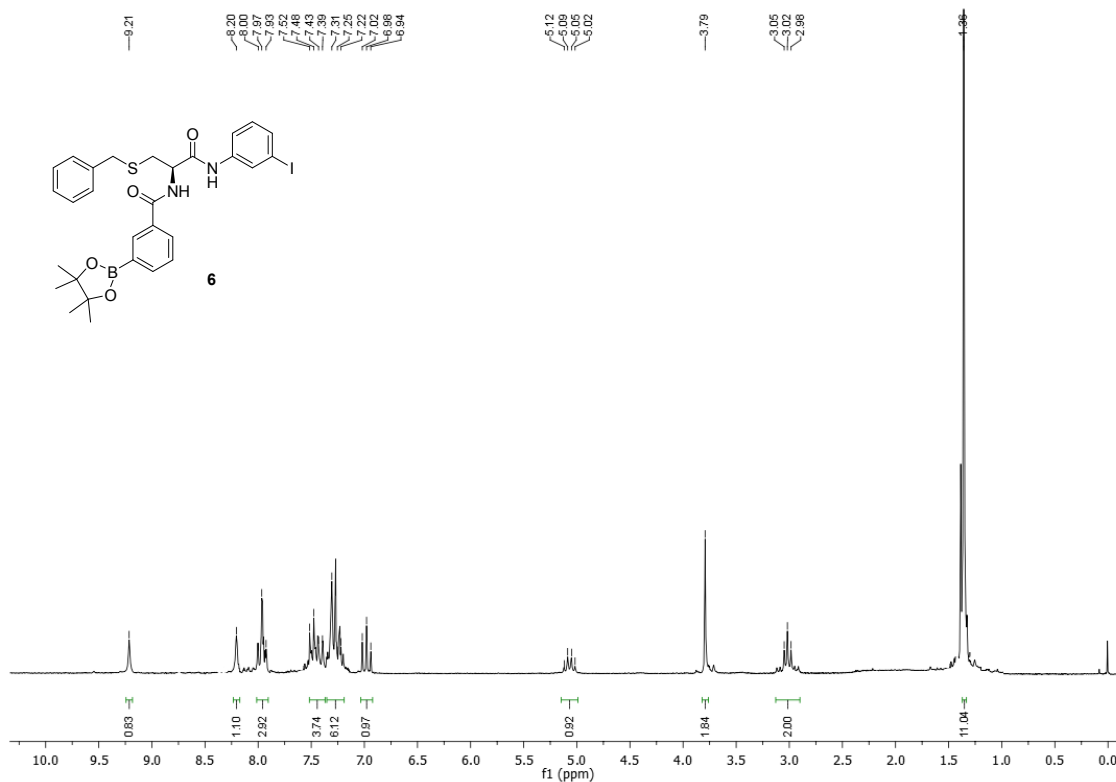

Figure S1: <sup>1</sup>H NMR spectrum (200 MHz, CDCl<sub>3</sub>) of compound **6**.

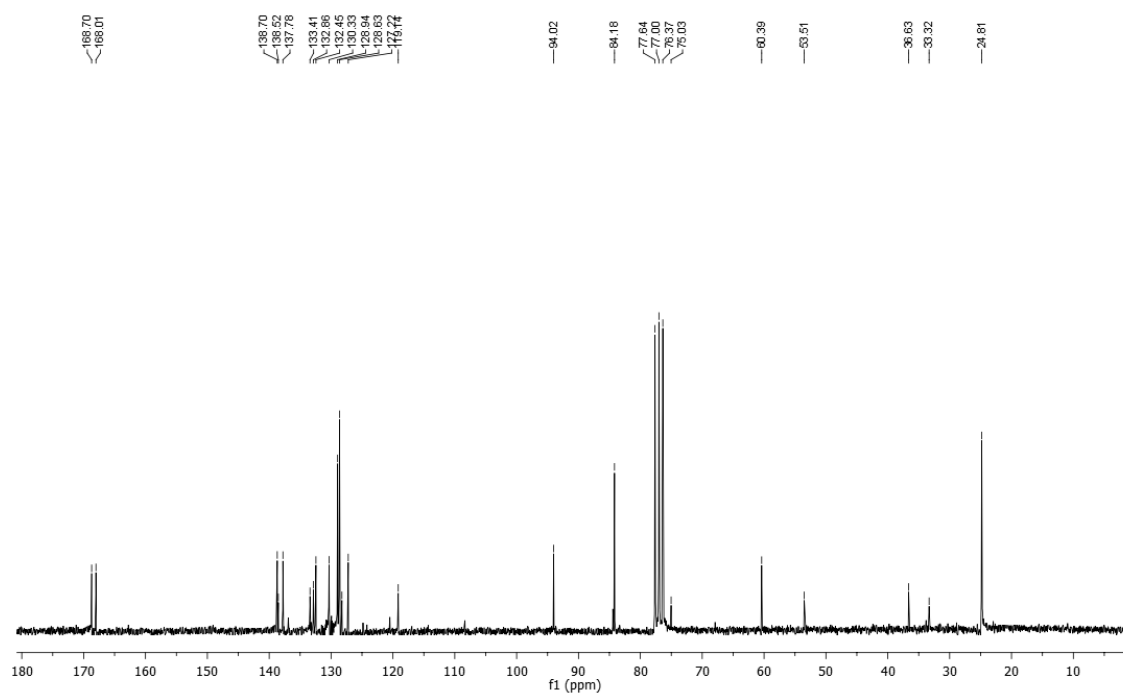

Figure S2: <sup>13</sup>C NMR spectrum (50 MHz, CDCl<sub>3</sub>) of compound **6**.

(*R*)-*tert*-butyl 3-(benzylthio)-1-oxo-1-(4-(4,4,5,5-tetramethyl-1,3,2-dioxaborolan-2-yl)phenylamino)propan-2-ylcarbamate **7a**:

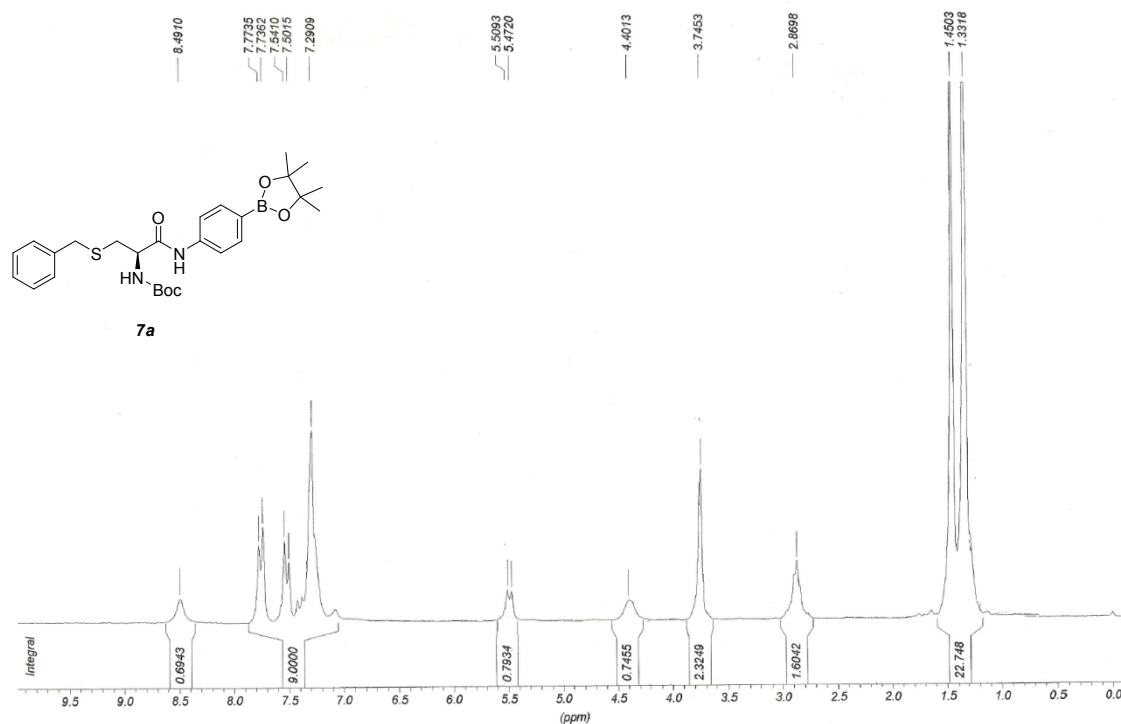

Figure S3: <sup>1</sup>H NMR spectrum (200 MHz, CDCl<sub>3</sub>) of compound **7a**.

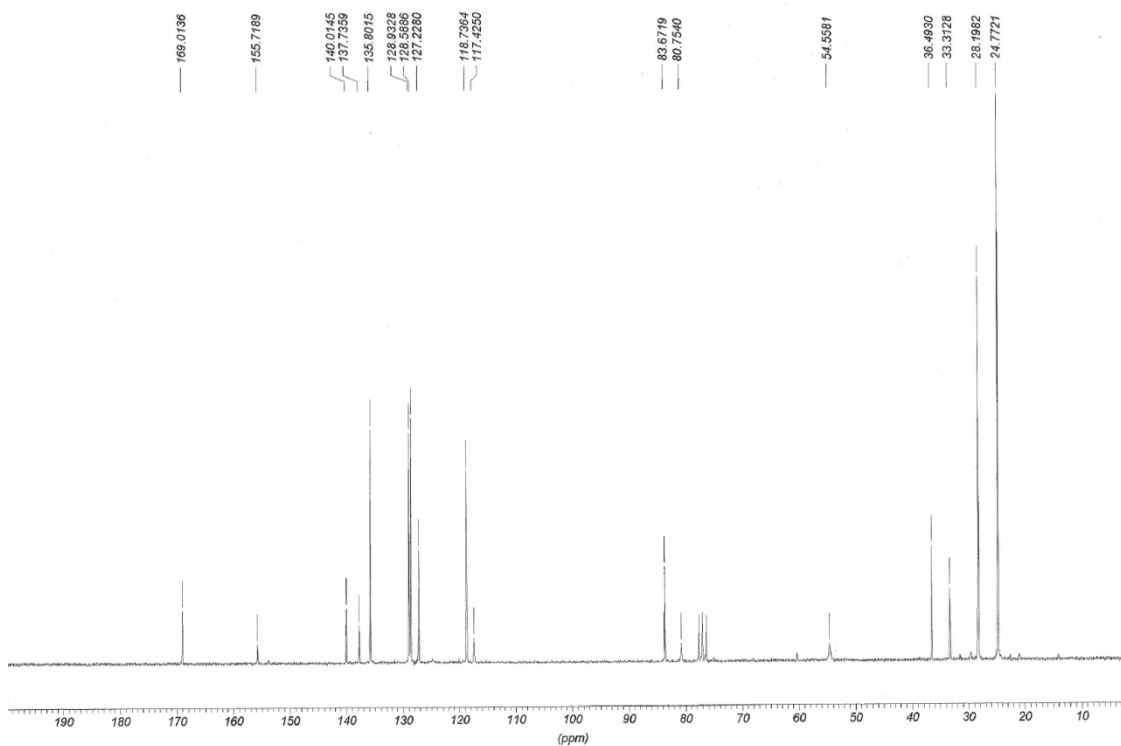

Figure S4: <sup>13</sup>C NMR spectrum (50 MHz, CDCl<sub>3</sub>) of compound **7a**.

(*R*)-*tert*-butyl 3-(benzylthio)-1-oxo-1-(3-(4,4,5,5-tetramethyl-1,3,2-dioxaborolan-2-yl)phenylamino)propan-2-ylcarbamate **7b**:

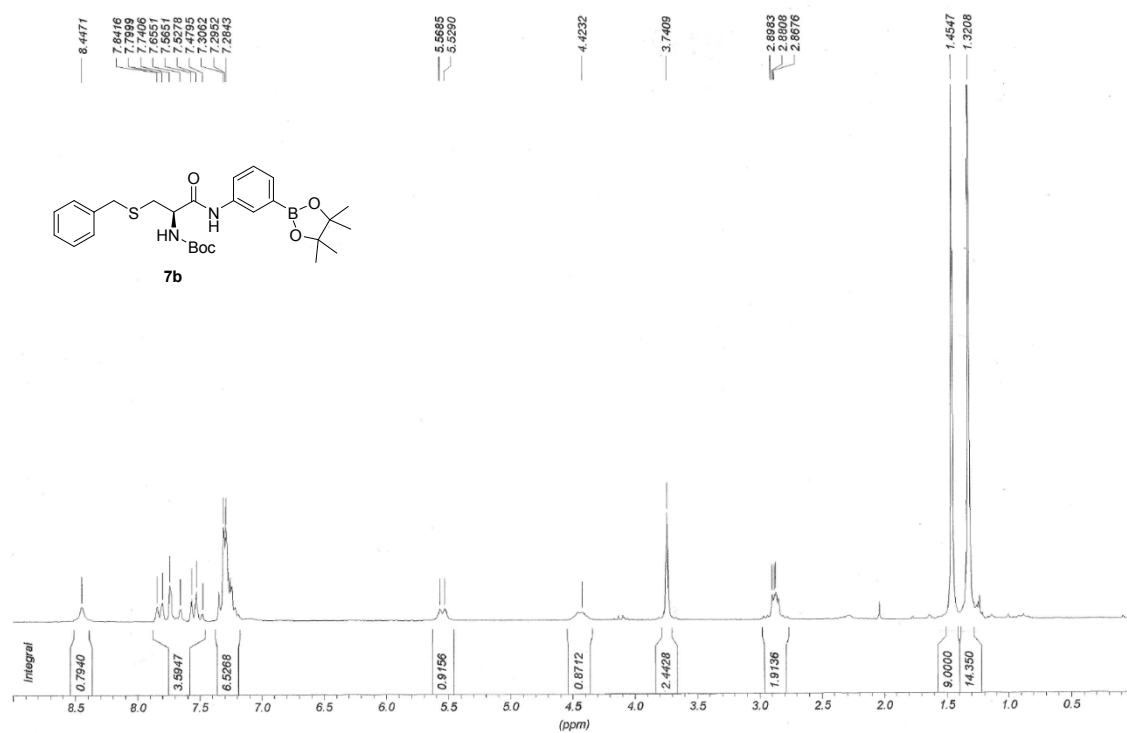

Figure S5: <sup>1</sup>H NMR spectrum (200 MHz, CDCl<sub>3</sub>) of compound **7b**.

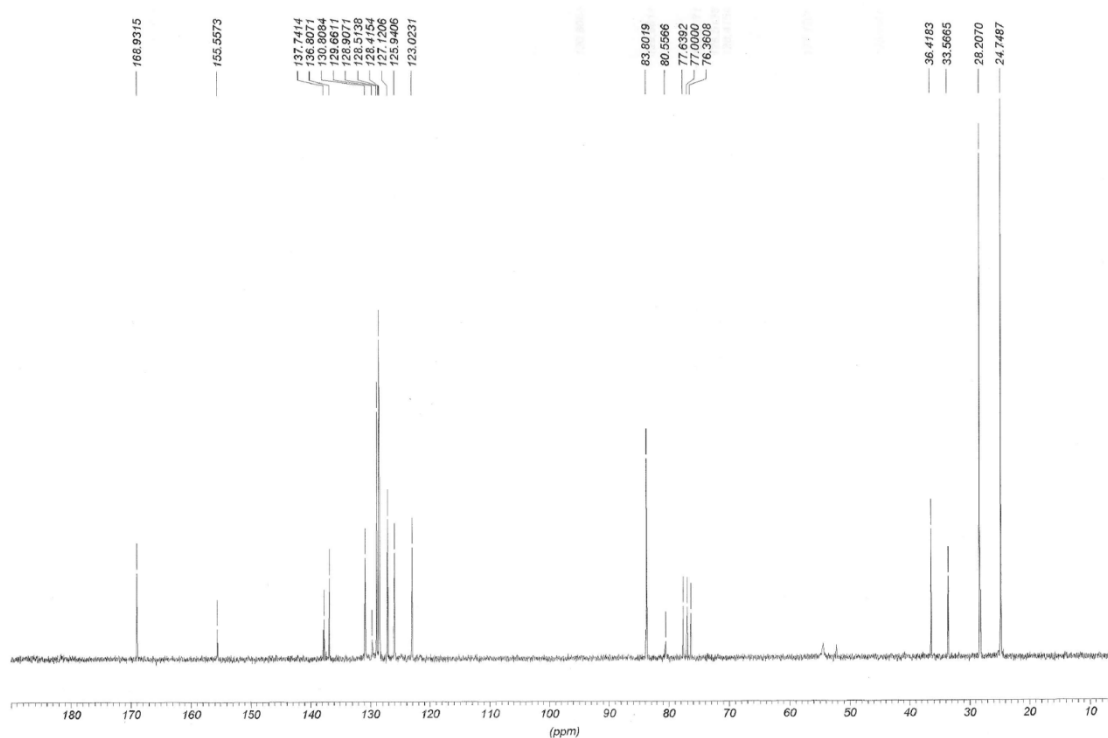

Figure S6: <sup>13</sup>C NMR spectrum (50 MHz, CDCl<sub>3</sub>) of compound **7b**.

(*R*)-methyl 3-(benzylthio)-1-oxo-1-(3-(4,4,5,5-tetramethyl-1,3,2-dioxaborolan-2-yl)phenylamino)propan-2-ylcarbamate **7c**:

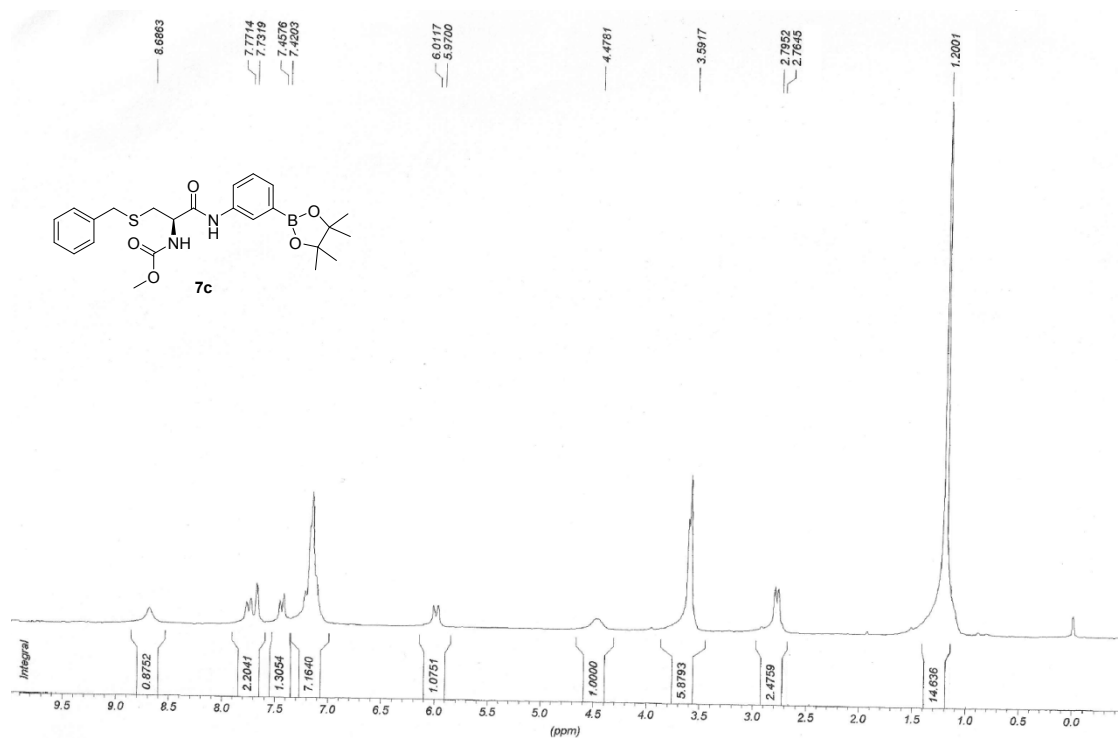

Figure S7: <sup>1</sup>H NMR spectrum (200 MHz, CDCl<sub>3</sub>) of compound **7c**.

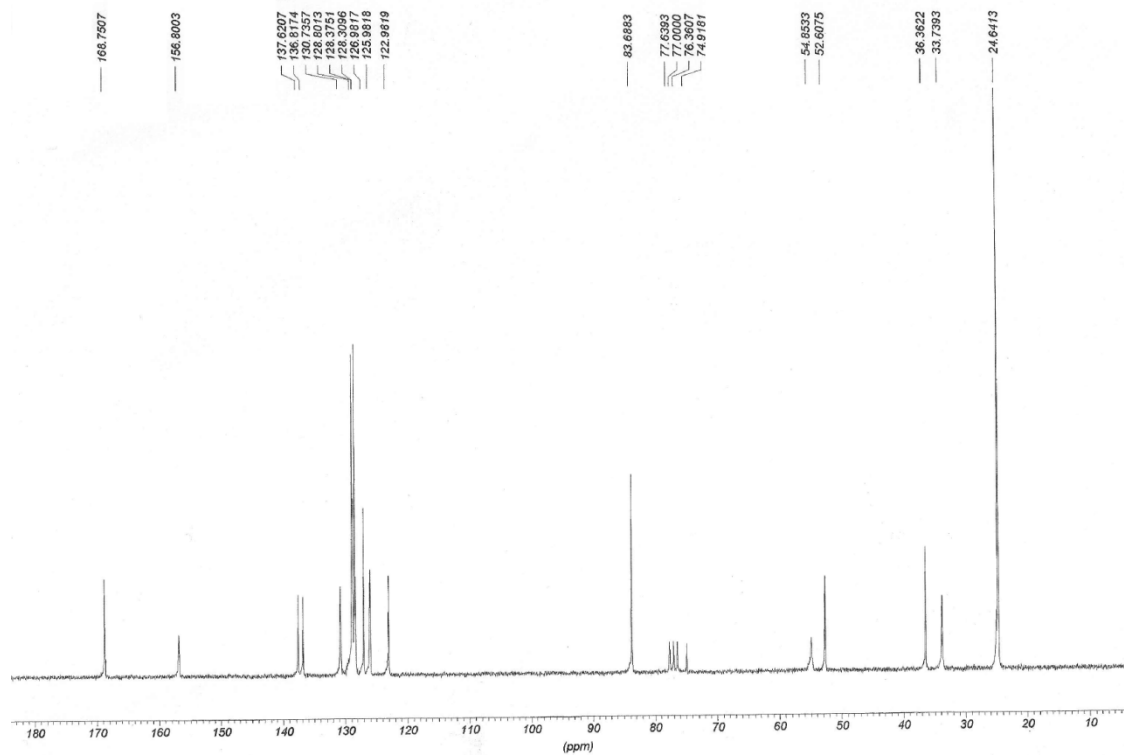

Figure S8: <sup>13</sup>C NMR spectrum (50 MHz, CDCl<sub>3</sub>) of compound **7c**.

(*R*)-3-(benzylthio)-2-pivalamido-N-(3-(4,4,5,5-tetramethyl-1,3,2-dioxaborolan-2-yl)phenyl)propanamide **7d**:

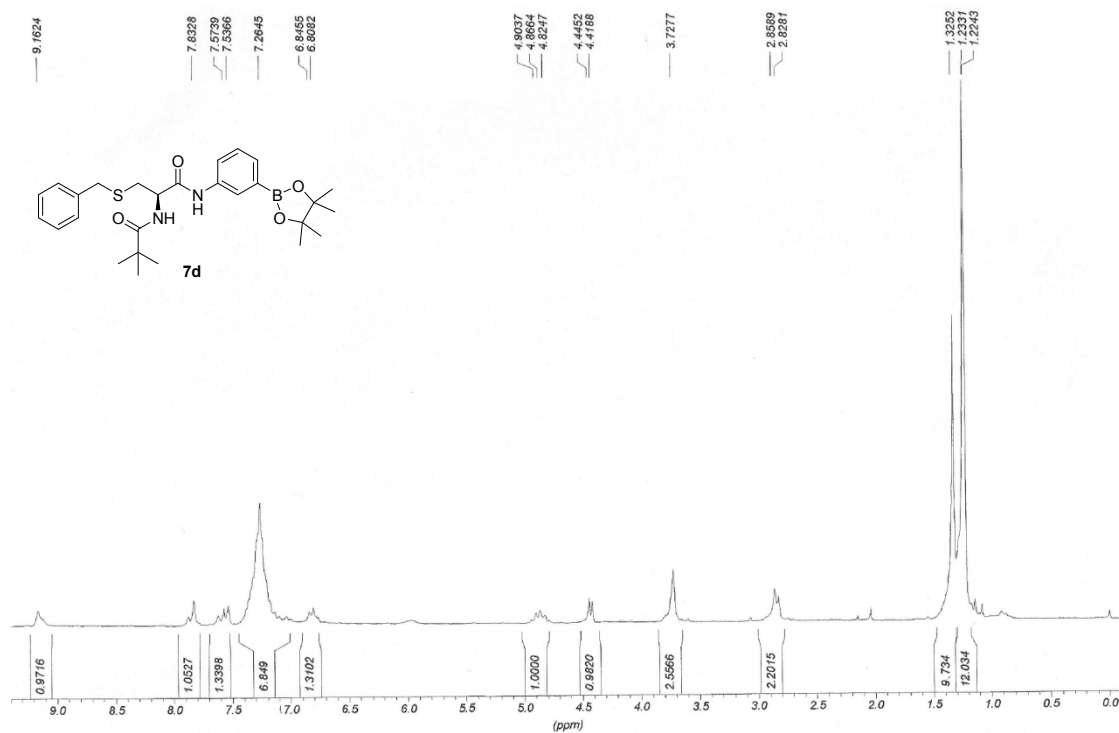

Figure S9: <sup>1</sup>H NMR spectrum (200 MHz, CDCl<sub>3</sub>) of compound **7d**.

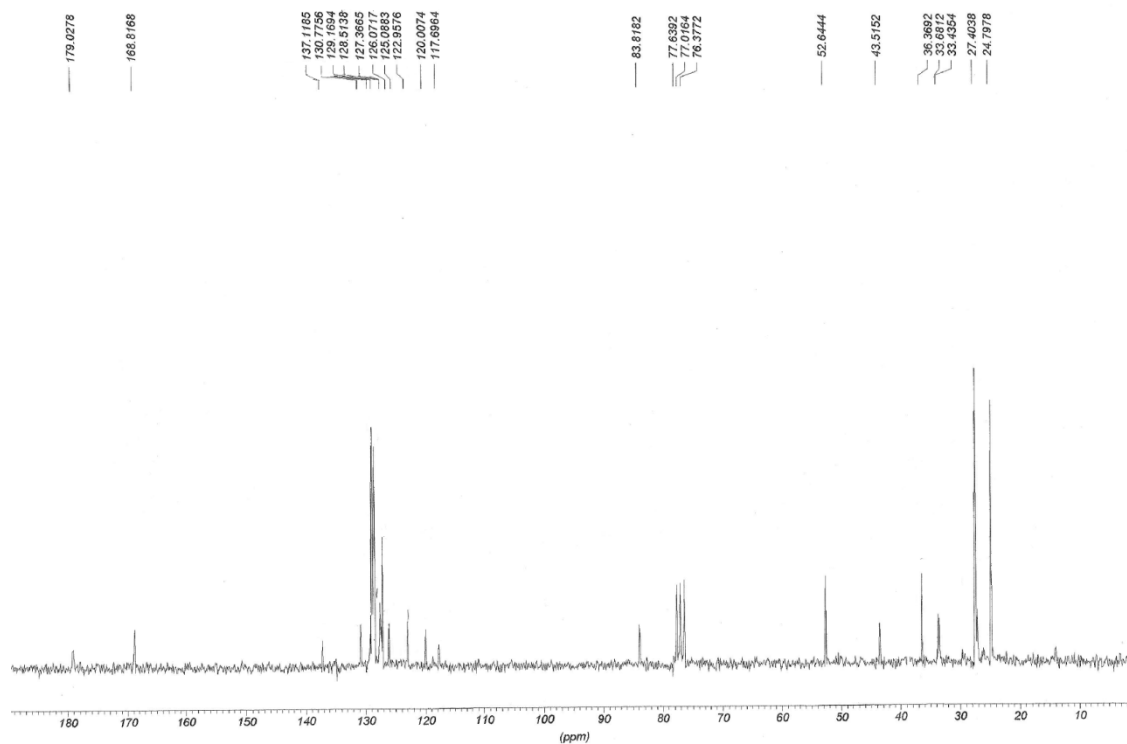

Figure S10: <sup>13</sup>C NMR spectrum (50 MHz, CDCl<sub>3</sub>) of compound **7d**.

*(R)*-tert-butyl-3-(methylthio)-1-oxo-1-(3-(4,4,5,5-tetramethyl-1,3,2-dioxaborolan-2-yl)phenylamino)propan-2-ylcarbamate **7e**:

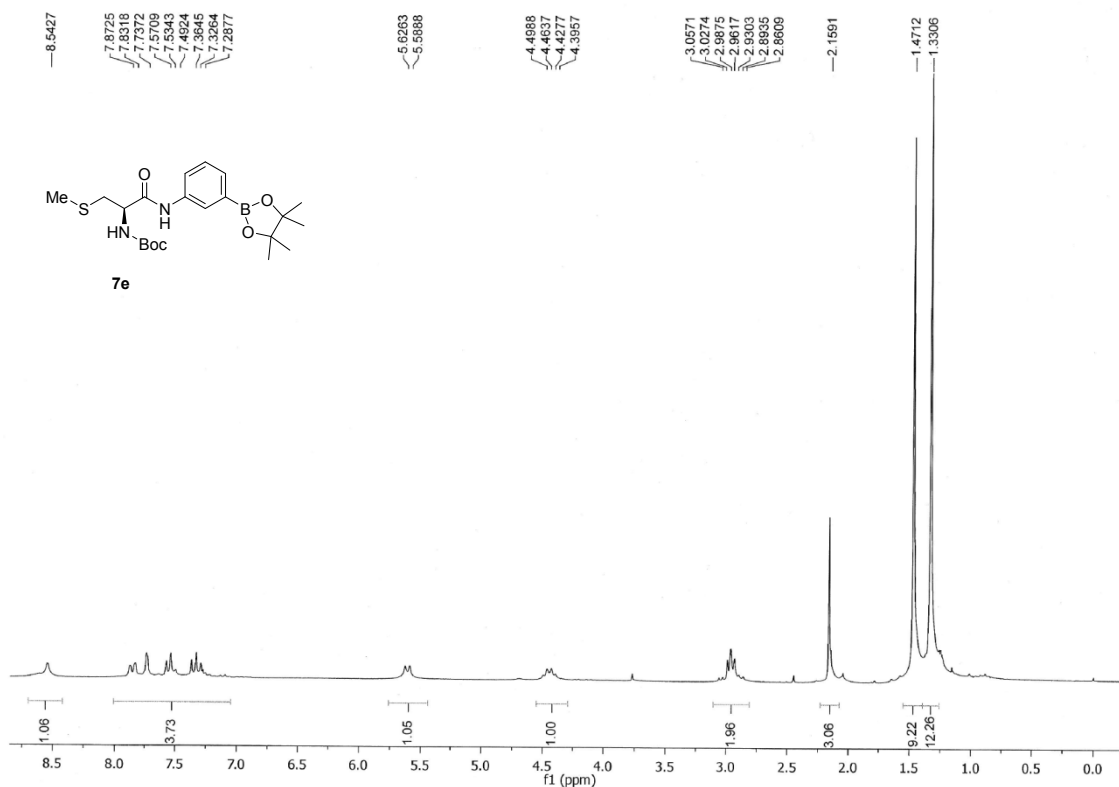

Figure S11: <sup>1</sup>H NMR spectrum (200 MHz, CDCl<sub>3</sub>) of compound **7e**.

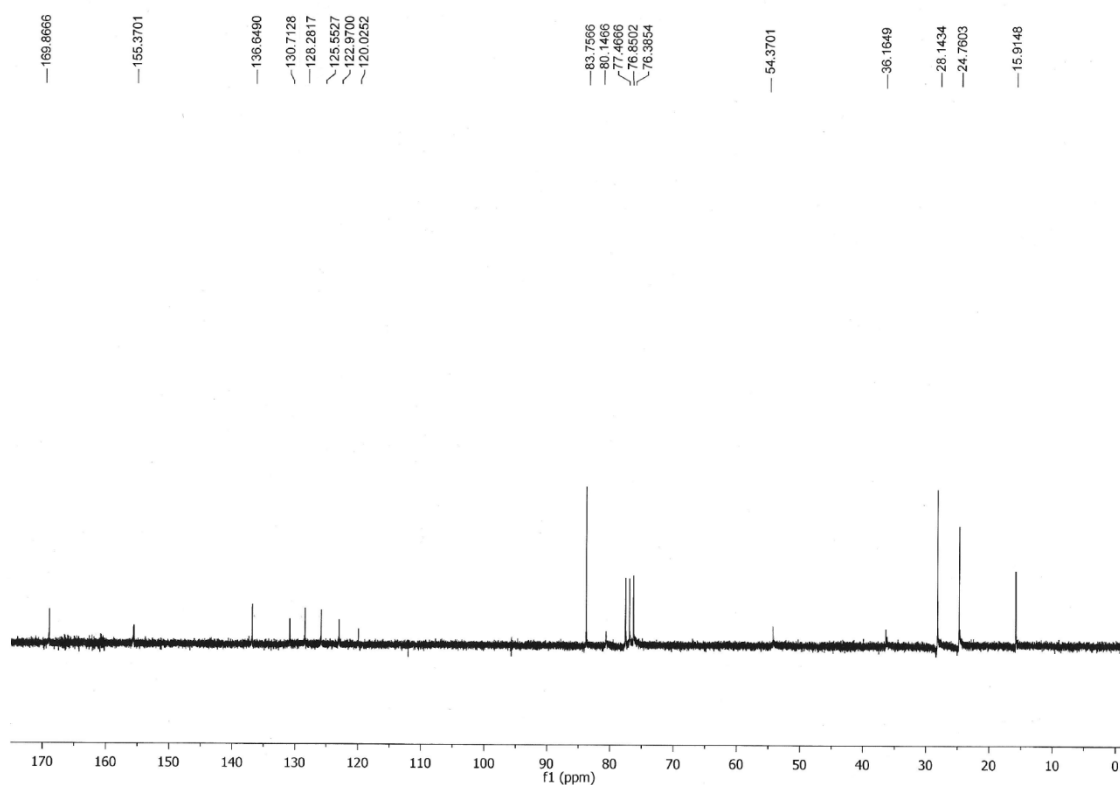

Figure S12: <sup>13</sup>C NMR spectrum (50 MHz, CDCl<sub>3</sub>) of compound **7e**.

*(R)*-*N*-(3-(benzylthio)-1-oxo-1-(4-(4,4,5,5-tetramethyl-1,3,2-dioxaborolan-2-yl)phenylamino)propan-2-yl)pyrazine-2-carboxamide **7f**:

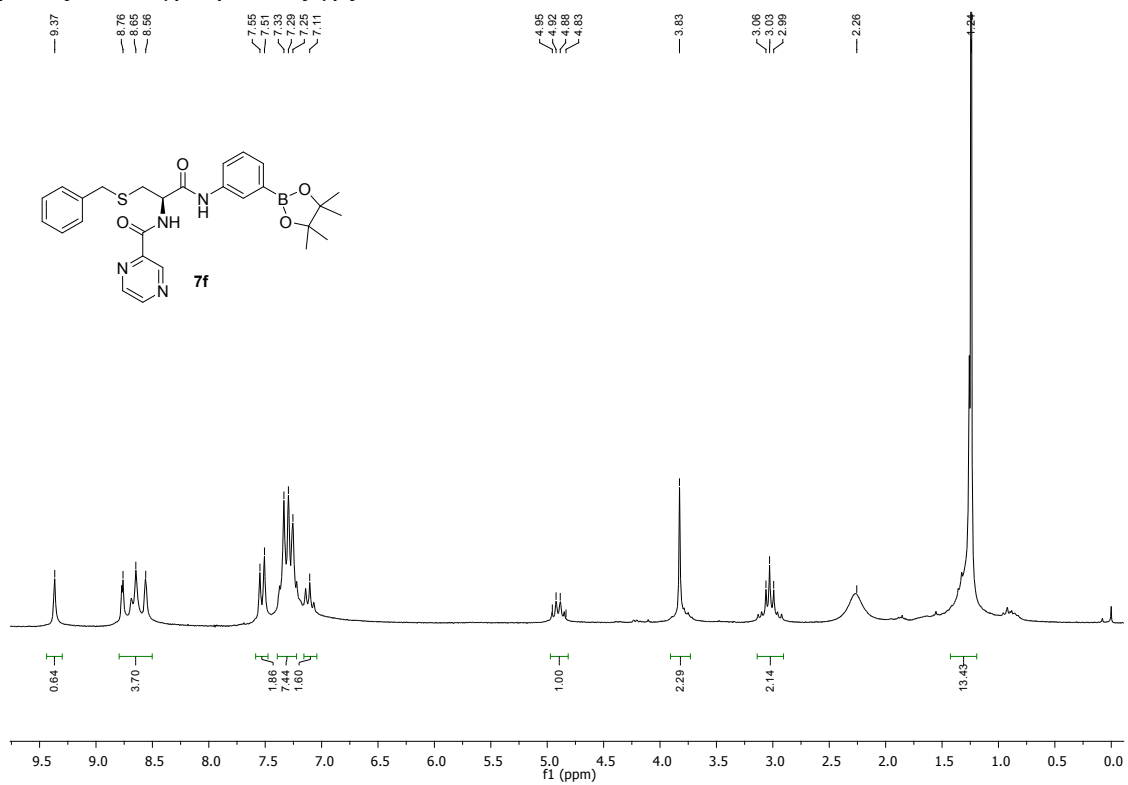

Figure S13:  $^1\text{H}$  NMR spectrum (200 MHz,  $\text{CDCl}_3$ ) of compound **7f**.

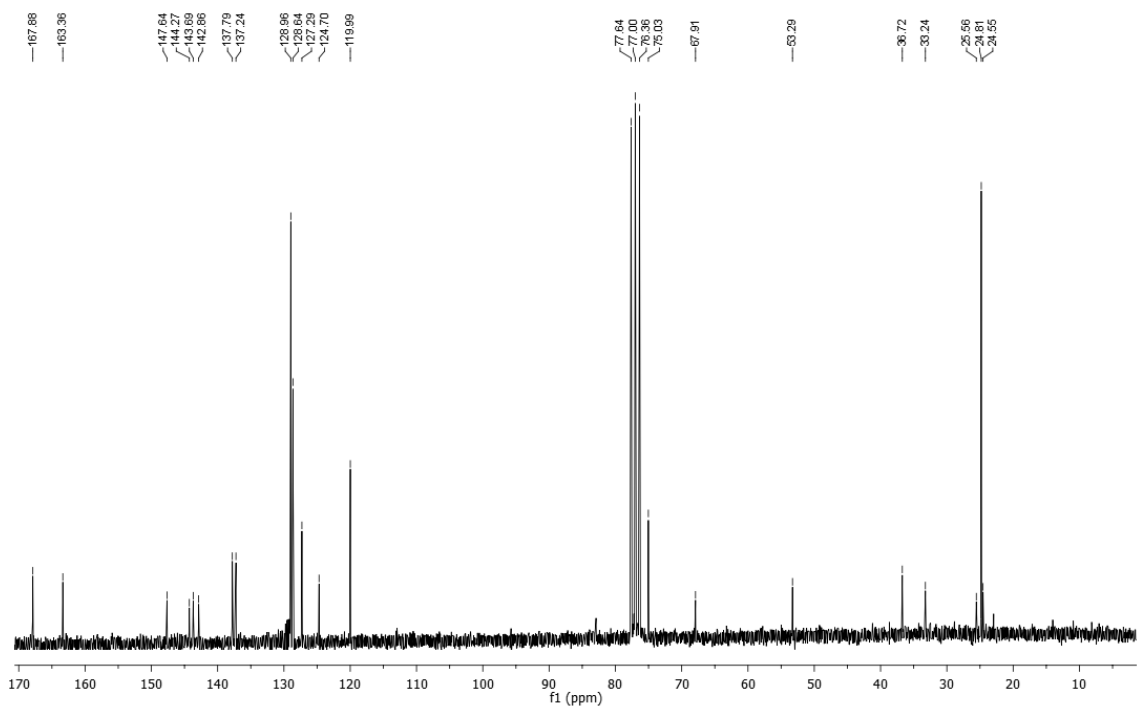

Figure S14:  $^{13}\text{C}$  NMR spectrum (50 MHz,  $\text{CDCl}_3$ ) of compound **7f**.



*(R)*-3-(3-(benzylthio)-2-(methoxycarbonylamino)propanamido)phenylboronic acid **7g**:

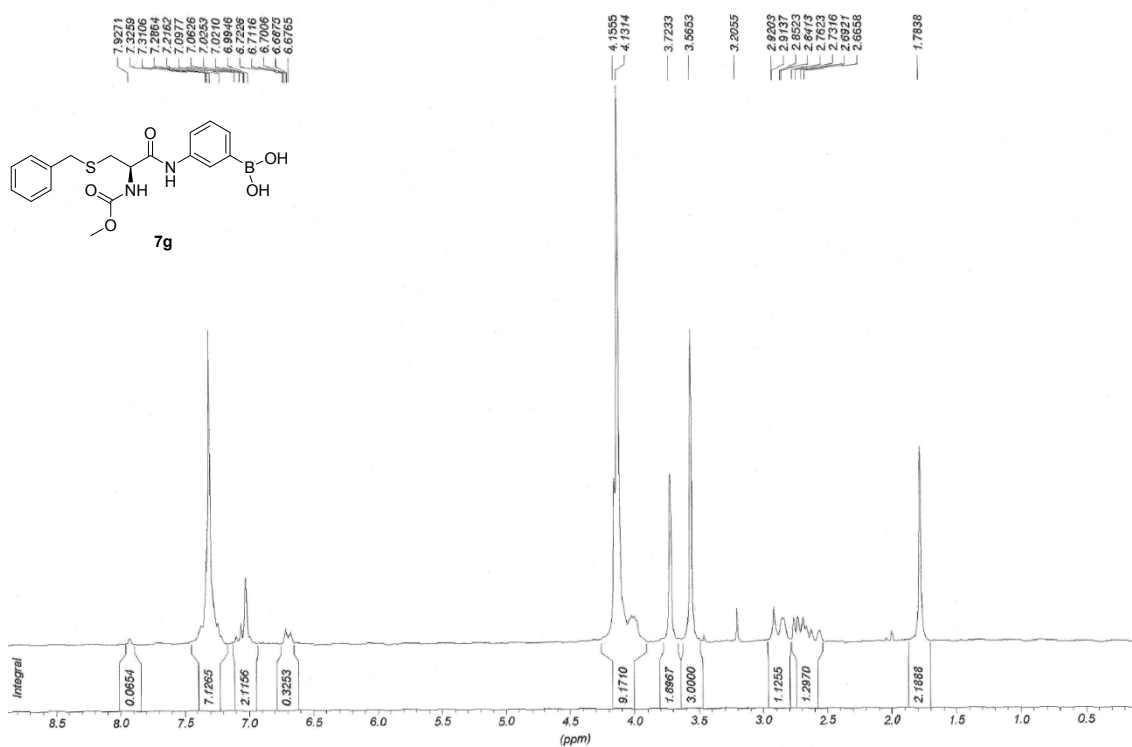

Figure S15: <sup>1</sup>H NMR spectrum (200 MHz, DMSO + D<sub>2</sub>O) of compound **7g**.

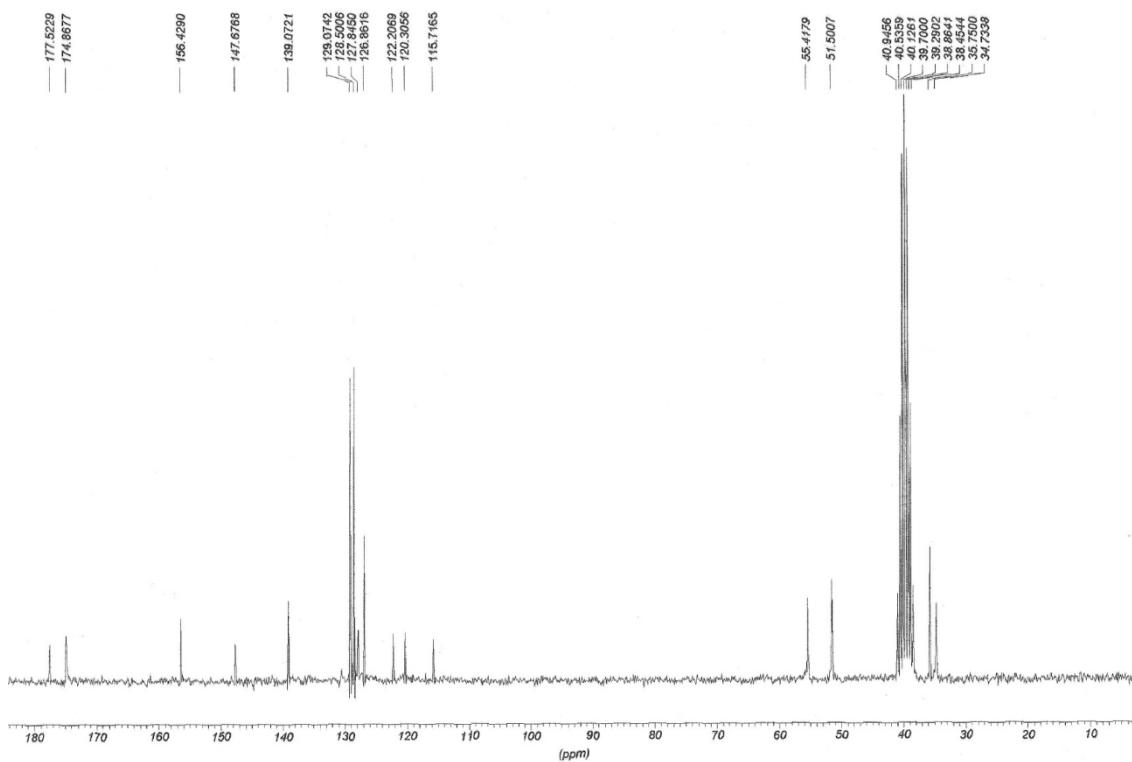

Figure S16: <sup>13</sup>C NMR spectrum (50 MHz, DMSO + D<sub>2</sub>O) of compound **7g**.

(*R*)-*tert*-butyl 3-(benzylthio)-1-oxo-1-((3-(4,4,5,5-tetramethyl-1,3,2-dioxaborolan-2-yl)propylamino)propan-2-yl)carbamate **8a**:

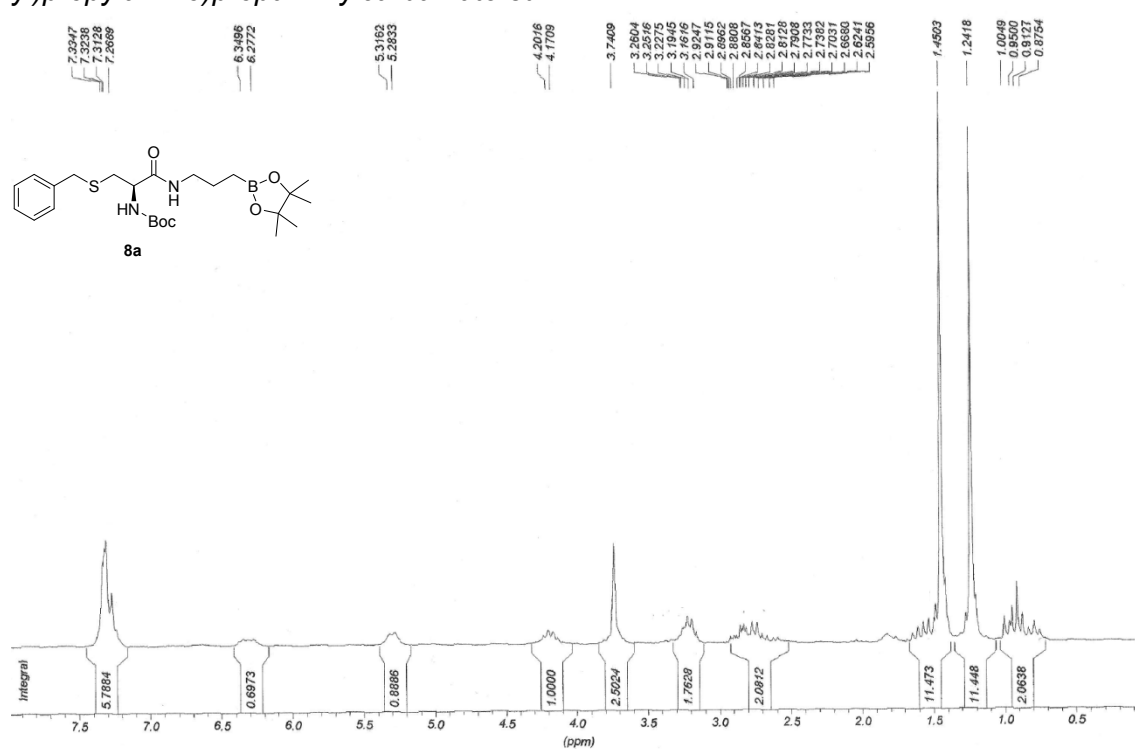

Figure S17:  $^1\text{H}$  NMR spectrum (200 MHz,  $\text{CDCl}_3$ ) of compound **8a**.

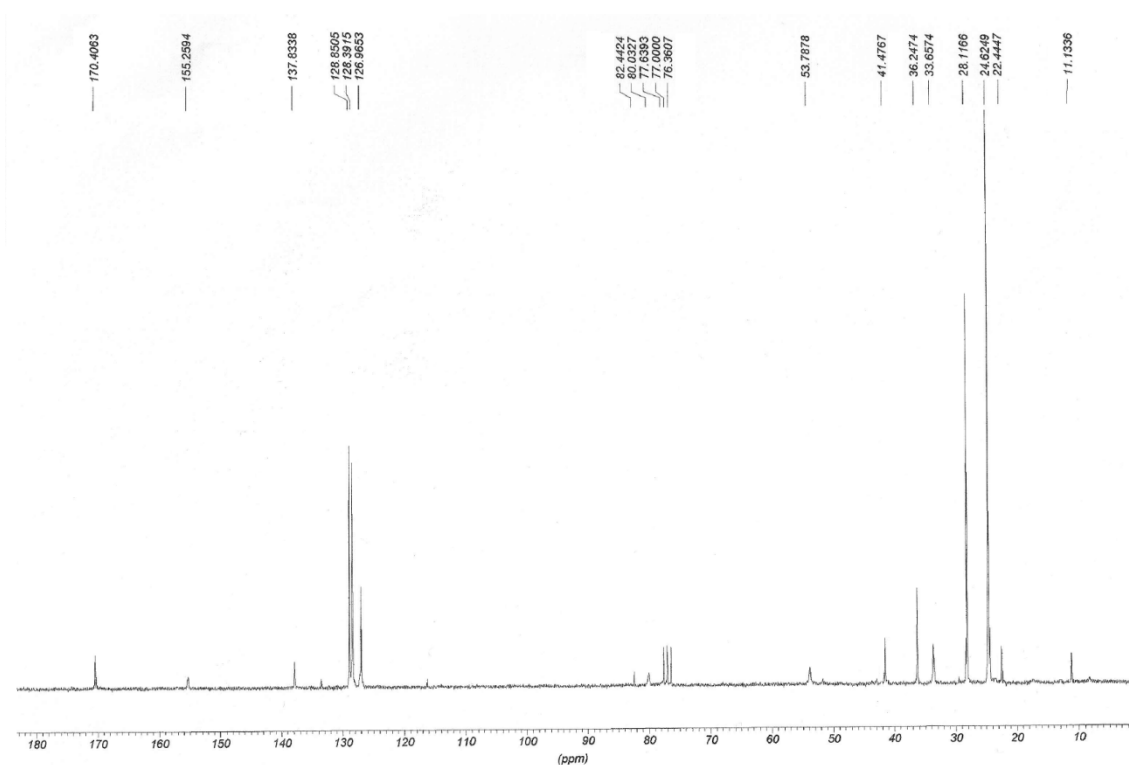

Figure S18:  $^{13}\text{C}$  NMR spectrum (50 MHz,  $\text{CDCl}_3$ ) of compound **8a**.

(R)-3-(3-(benzylthio)-2-((tert-butoxycarbonylamino)propanamido)propylboronic acid **8b**

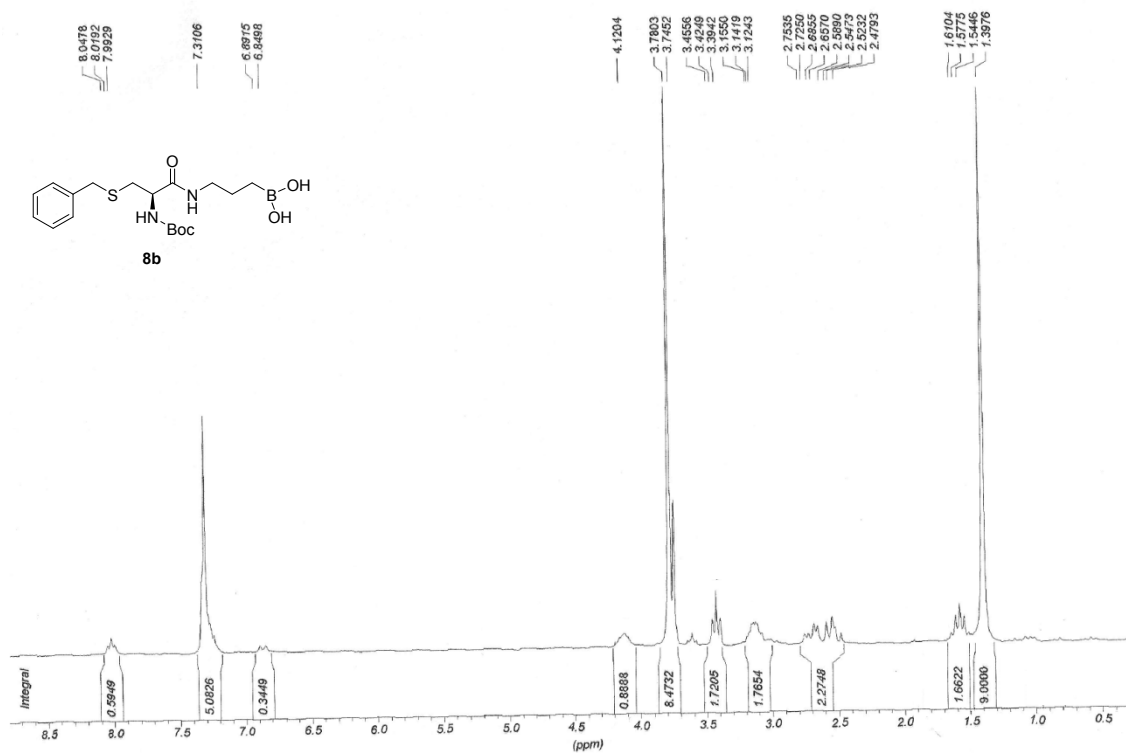

Figure S19: <sup>1</sup>H NMR spectrum (200 MHz, DMSO + D<sub>2</sub>O) of compound **8b**.

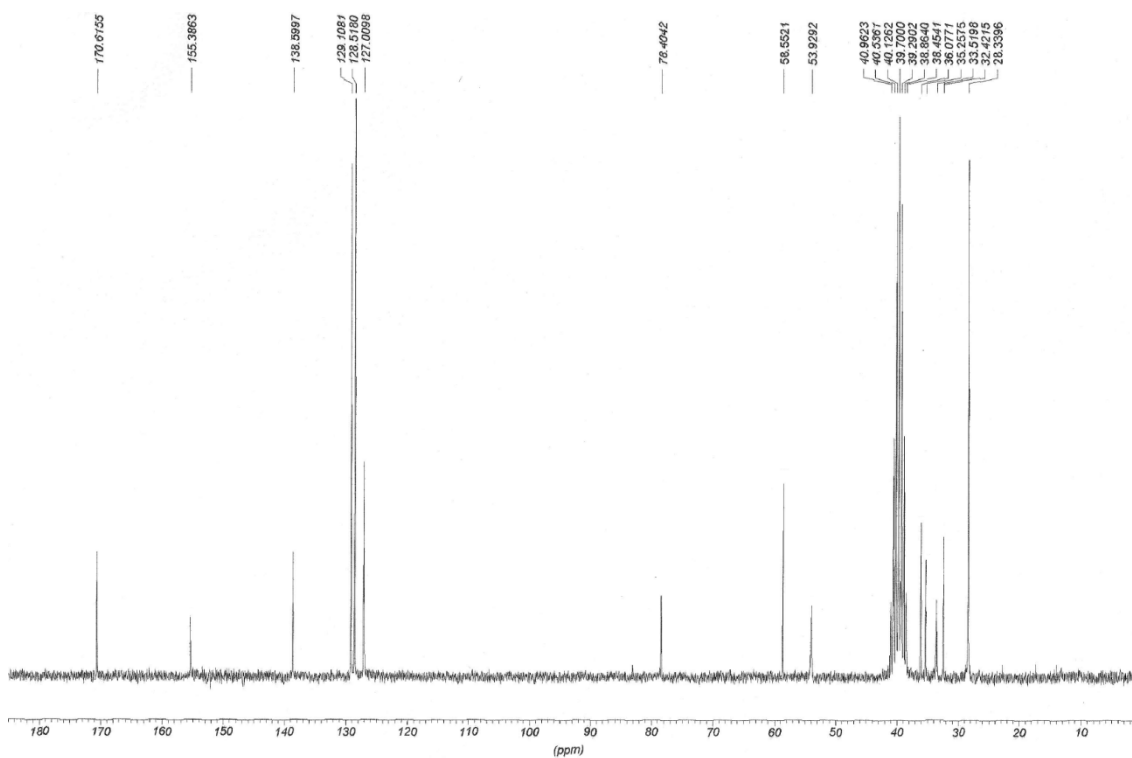

Figure S20: <sup>13</sup>C NMR spectrum (200 MHz, DMSO + D<sub>2</sub>O) of compound **8b**.

Determination of  $V_{\max}$  e  $K_m$  of proteasome 20S and complex proteasome 20S/inhibitor in different concentrations.

|                             | $V_{\max}$ | $K_m$ |
|-----------------------------|------------|-------|
| Control                     | 3.764      | 0.078 |
| Inhibitor 50 $\mu\text{M}$  | 2.198      | 0.109 |
| Inhibitor 100 $\mu\text{M}$ | 2.108      | 0.140 |
| Inhibitor 150 $\mu\text{M}$ | 2.038      | 0.171 |

- Evaluation of 4a-g as inhibitors of the  $\beta$ 5-site (chymotrypsin-like) of the mammalian 20S proteasome

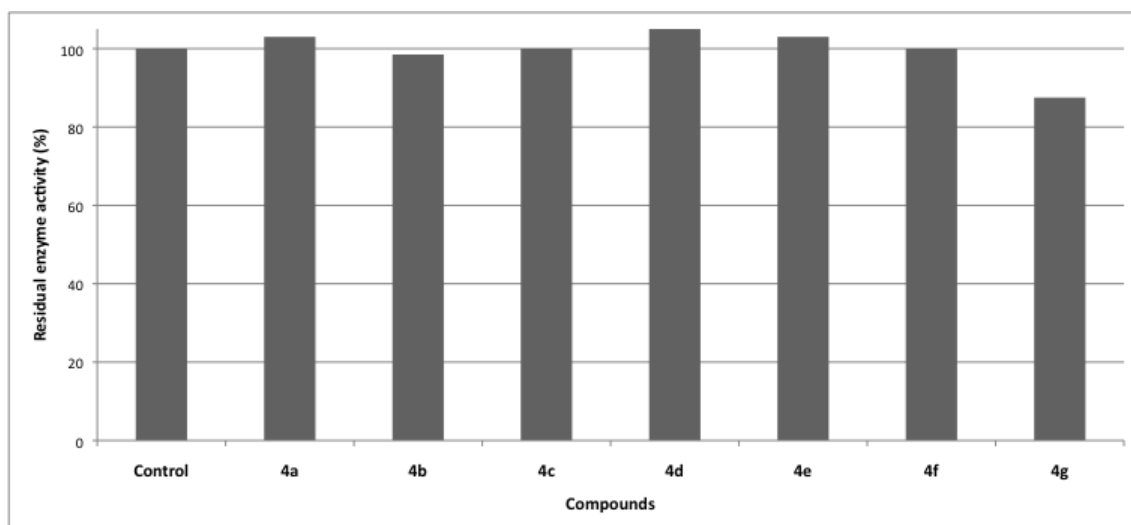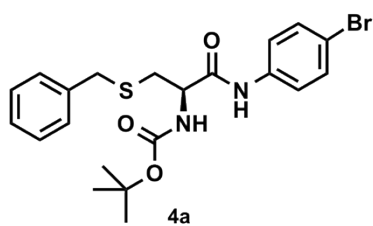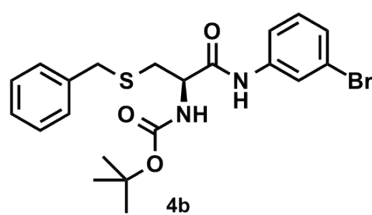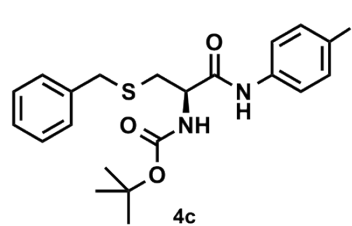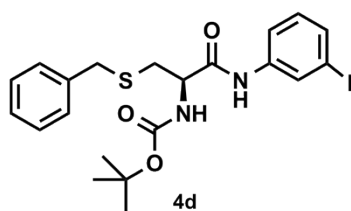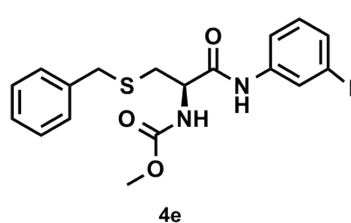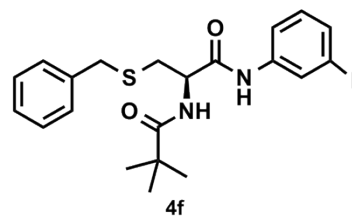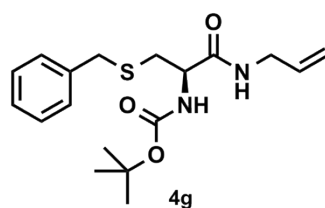

Supplement: c4nj00612g1.pdf [file c4nj00612g1.pdf]
